# Supplementary material for: An improved logistic regression model based on a spatially weighted technique (ILRBSWT v1.0) and its application to mineral prospectivity mapping
Source: Copernicus journal article supplement (doi:10.5194/gmd-11-2525-2018), 2018-06-25
Supplement: Supplementary file [file gmd-11-2525-2018-supplement-title-page.pdf › gmd-11-2525-2018-supplement-title-page.pdf]

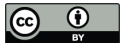

## *Supplement of*

# **An improved logistic regression model based on a spatially weighted technique (ILRBSWT v1.0) and its application to mineral prospectivity mapping**

**D. Zhang et al.**

*Correspondence to:* Daojun Zhang (cugzdj@gmail.com) and Xianhui Hou (houxh1019@126.com)

- gmd-11-2525-2018-supplement-title-page.pdf
- gmd-2017-278-supplement\_20180511
  - Data
    - \* no missing
    - \* with missing
  - Executable Programs for ILRBSWT
    - \* GeoWeiLogRegBasedOnGridLayer.exe
    - \* GeoWeiLogRegBasedOnGridLayer.pdb
    - \* GeoWeiLogRegBasedOnGridLayer.vshost.exe
    - \* GeoWeiLogRegBasedOnGridLayer.vshost.exe.manifest
    - \* Resources
    - \* WorldLab.GeoDataLib.dll
    - \* WorldLab.GeoDataLib.pdb
    - \* WorldLab.MathLib.dll
    - \* WorldLab.MathLib.pdb
    - \* WorldLab.SampleAnalysisLib.dll
    - \* WorldLab.SampleAnalysisLib.pdb
  - source code for ILRBSWT in C#
    - \* .vs
    - \* 0 README.txt
    - \* ILRBSWT
    - \* WLGeoDataLib
    - \* WLMathLib
    - \* WLStatisticsLib
    - \* WorldLab.sln

The copyright of individual parts of the supplement might differ from the CC BY 4.0 License.
